# Supplementary material for: Colorimetric determination of tetracyclines based on aptamer-mediated dual regulation of gold nanoparticle aggregation and in situ silver metallization
Source: Royal Society of Chemistry journal article supplement (doi:10.1039/d2ay00368f), 2022-01-01
Supplement: d2ay00368f1.pdf [file d2ay00368f1.pdf]

## **Electronic Supplementary Material**

# **Colorimetric determination of tetracyclines based on aptamer-mediated dual regulation of gold nanoparticle aggregation and in situ silver metallization**

Dingmin Liu, Pengcheng Huang\*, Fang-Ying Wu\*

College of Chemistry, Nanchang University, Nanchang 330031, China

\*Corresponding Author: Pengcheng Huang, [pchuang@ncu.edu.cn](mailto:pchuang@ncu.edu.cn), Fang-Ying Wu, [fywu@ncu.edu.cn](mailto:fywu@ncu.edu.cn), Tel: + 86 79183969514, Fax: + 86 79183969514.

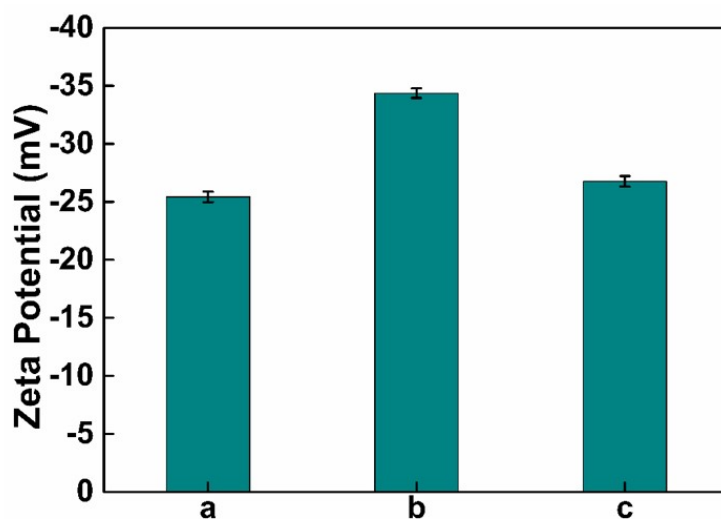

**Fig. S1**  $\zeta$ -potential analysis of different mixtures. (a) AuNPs (b) Apts+AuNPs (c) Apts+Mg(NO<sub>3</sub>)<sub>2</sub>+AuNPs+TET. Substance concentration: 0.0317  $\mu\text{mol}\cdot\text{L}^{-1}$  AuNPs, 0.08  $\mu\text{mol}\cdot\text{L}^{-1}$  Apts, 500  $\mu\text{mol}\cdot\text{L}^{-1}$  Mg(NO<sub>3</sub>)<sub>2</sub>, 4  $\mu\text{mol}\cdot\text{L}^{-1}$  TET

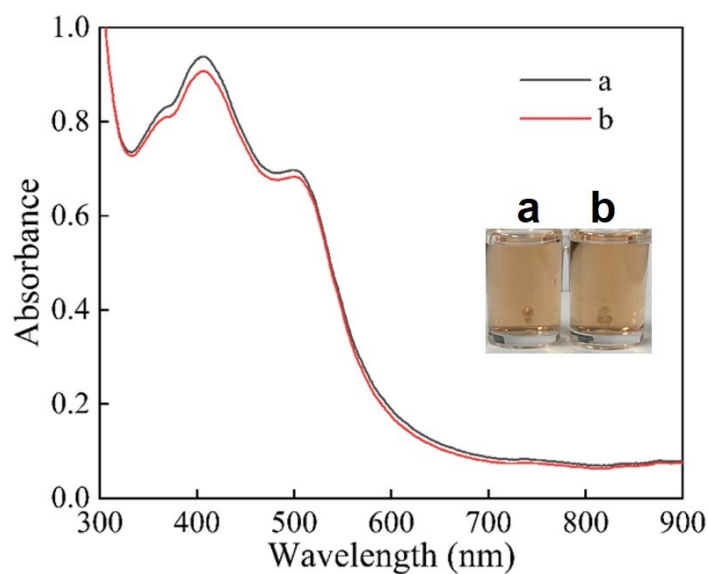

**Fig. S2** UV-vis absorption spectra of different mixtures and the corresponding photographs. (a) Random Apts+AuNPs+p-aminophenol+AgNO<sub>3</sub>. (b) Random Apts+Mg(NO<sub>3</sub>)<sub>2</sub>+AuNPs +TET+p-aminophenol+AgNO<sub>3</sub>. Substance concentration: 120  $\mu\text{mol}\cdot\text{L}^{-1}$  AgNO<sub>3</sub>, 120  $\mu\text{mol}\cdot\text{L}^{-1}$  p-aminophenol, 0.0317  $\mu\text{mol}\cdot\text{L}^{-1}$  AuNPs, 0.08  $\mu\text{mol}\cdot\text{L}^{-1}$  Apts, 4  $\mu\text{mol}\cdot\text{L}^{-1}$  TET, 500  $\mu\text{mol}\cdot\text{L}^{-1}$  Mg(NO<sub>3</sub>)<sub>2</sub>

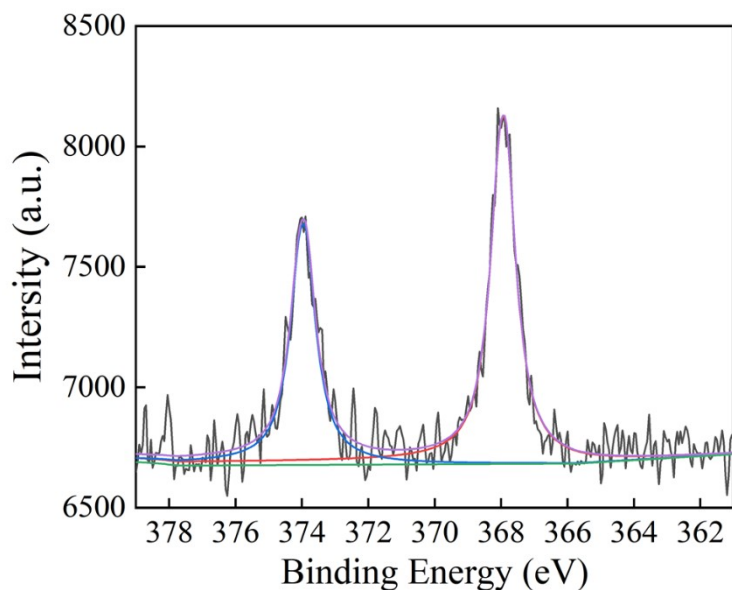

**Fig. S3** High resolution XPS spectrum for Ag3d

In 9 groups of experiments, by averaging the  $\Delta(A_{600}/A_{410})$  obtained for each concentration of each factor. It is not difficult to find that the optimal levels of  $Mg^{2+}$ , Apt, and  $Ag^+$  are  $500 \mu\text{mol}\cdot\text{L}^{-1}$ ,  $0.08 \mu\text{mol}\cdot\text{L}^{-1}$ , and  $120 \mu\text{mol}\cdot\text{L}^{-1}$ , respectively. At this concentration, we measured  $\Delta(A_{600}/A_{410}) = 0.60$ . This is better than the previous 9 sets of experiments. So  $Mg^{2+} = 500 \mu\text{mol}\cdot\text{L}^{-1}$ , Apt =  $0.08 \mu\text{mol}\cdot\text{L}^{-1}$ , Ag =  $120 \mu\text{mol}\cdot\text{L}^{-1}$  were determined.

**Table S1** Orthogonal experiment arrangement and results

| Experiment number | Factors                                            |                                              |                                                 | $\Delta(A_{600}/A_{410})$ |
|-------------------|----------------------------------------------------|----------------------------------------------|-------------------------------------------------|---------------------------|
|                   | $Mg^{2+}$<br>( $\mu\text{mol}\cdot\text{L}^{-1}$ ) | Apt<br>( $\mu\text{mol}\cdot\text{L}^{-1}$ ) | $Ag^+$<br>( $\mu\text{mol}\cdot\text{L}^{-1}$ ) |                           |
| 1                 | 400                                                | 0.08                                         | 80                                              | 0.56                      |
| 2                 | 400                                                | 0.10                                         | 100                                             | 0.47                      |
| 3                 | 400                                                | 0.12                                         | 120                                             | 0.39                      |
| 4                 | 500                                                | 0.08                                         | 100                                             | 0.52                      |
| 5                 | 500                                                | 0.10                                         | 120                                             | 0.50                      |
| 6                 | 500                                                | 0.12                                         | 80                                              | 0.43                      |
| 7                 | 600                                                | 0.08                                         | 120                                             | 0.39                      |
| 8                 | 600                                                | 0.10                                         | 100                                             | 0.38                      |
| 9                 | 600                                                | 0.12                                         | 80                                              | 0.47                      |
| Excellent level   | 500                                                | 0.08                                         | 120                                             | 0.60                      |

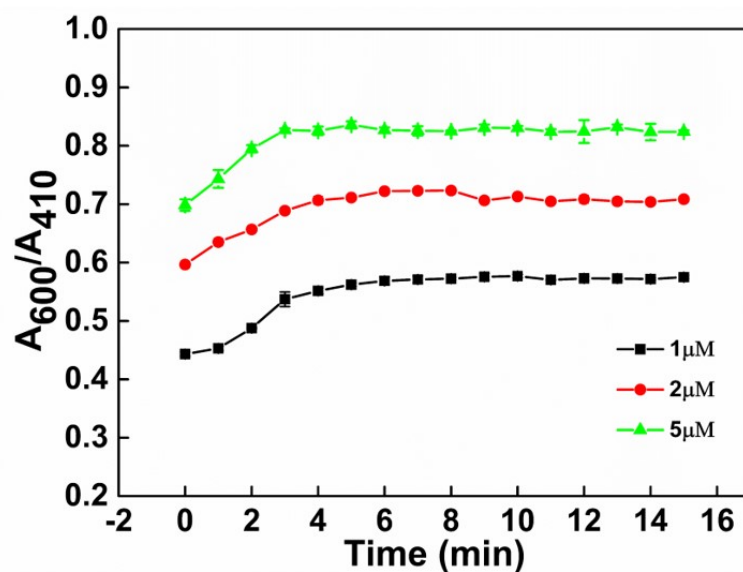

**Fig. S4** When the TET concentrations are  $1\mu\text{mol}\cdot\text{L}^{-1}$ ,  $2\mu\text{mol}\cdot\text{L}^{-1}$ ,  $5\mu\text{mol}\cdot\text{L}^{-1}$ , the values of  $A_{600}/A_{410}$  change with time. Substance concentration:  $120\mu\text{mol}\cdot\text{L}^{-1}$  p-aminophenol,  $120\mu\text{mol}\cdot\text{L}^{-1}$   $\text{AgNO}_3$ ,  $0.0317\mu\text{mol}\cdot\text{L}^{-1}$  AuNPs,  $0.08\mu\text{mol}\cdot\text{L}^{-1}$  Apts,  $500\mu\text{mol}\cdot\text{L}^{-1}$   $\text{Mg}(\text{NO}_3)_2$

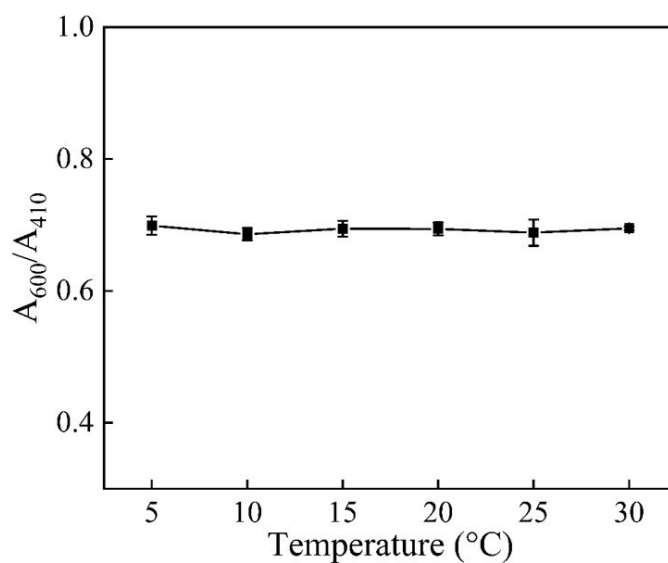

**Fig. S5** When the TET concentrations is  $2\mu\text{mol}\cdot\text{L}^{-1}$ , the values of  $A_{600}/A_{410}$  change with time. Substance temperature:  $120\mu\text{mol}\cdot\text{L}^{-1}$  p-aminophenol,  $120\mu\text{mol}\cdot\text{L}^{-1}$   $\text{AgNO}_3$ ,  $0.0317\mu\text{mol}\cdot\text{L}^{-1}$  AuNPs,  $0.08\mu\text{mol}\cdot\text{L}^{-1}$  Apts,  $500\mu\text{mol}\cdot\text{L}^{-1}$   $\text{Mg}(\text{NO}_3)_2$

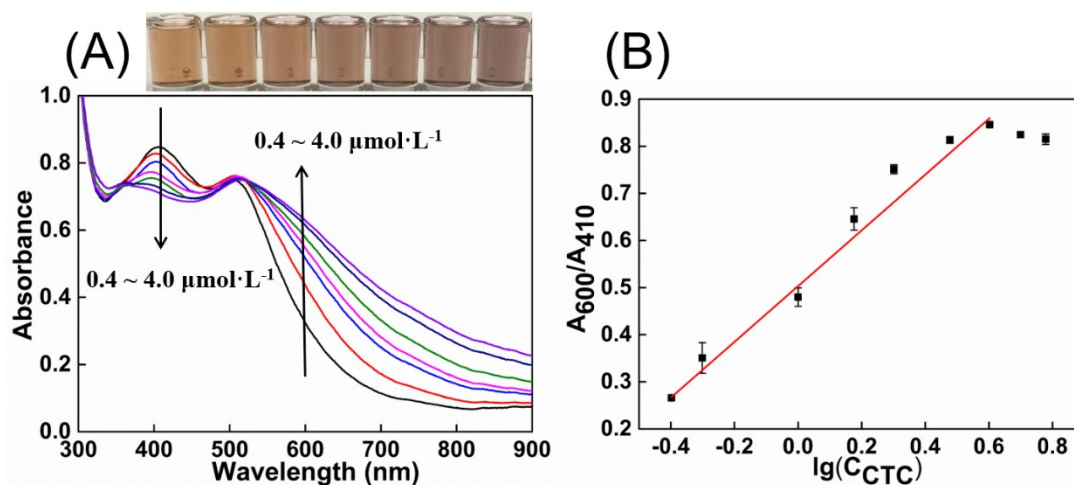

**Fig. S6** (A) The UV-vis absorption spectra of the experiment at different concentrations of CTC ( $0.4, 0.8, 1, 2, 3, 4 \mu\text{mol}\cdot\text{L}^{-1}$ ) and the corresponding photographs. The upper illustration shows the photos of the corresponding concentrations. (B) Fitting curve of  $A_{600}/A_{410}$  and  $\lg(C_{\text{CTC}})$ . Error bars represent the standard deviation of three independent measurements. Substance concentration:  $120 \mu\text{mol}\cdot\text{L}^{-1}$  p-aminophenol,  $120 \mu\text{mol}\cdot\text{L}^{-1}$   $\text{AgNO}_3$ ,  $0.0317 \mu\text{mol}\cdot\text{L}^{-1}$  AuNPs,  $0.08 \mu\text{mol}\cdot\text{L}^{-1}$  Apts,  $500 \mu\text{mol}\cdot\text{L}^{-1}$   $\text{Mg}(\text{NO}_3)_2$

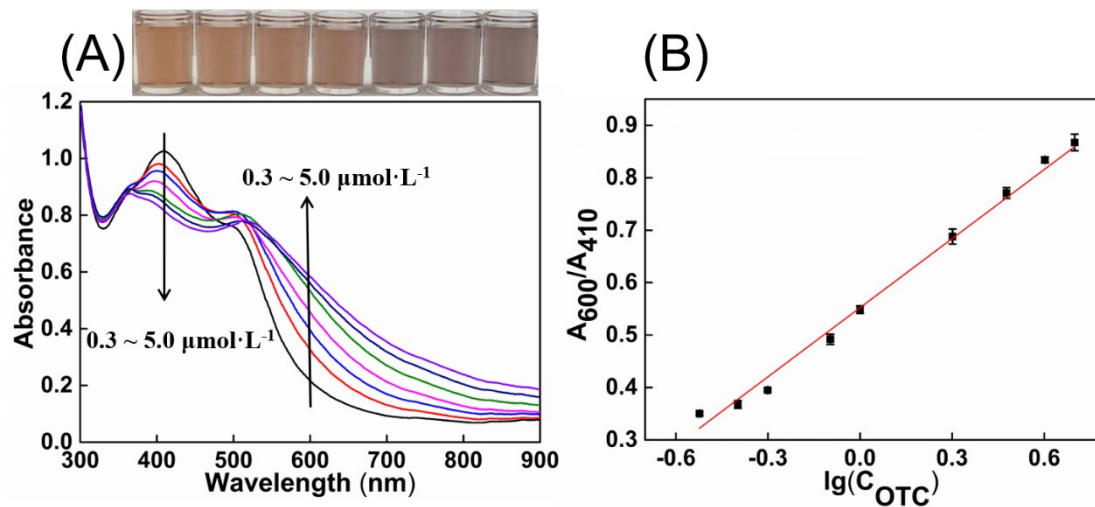

**Fig. S7** (A) The UV-vis absorption spectra of the experiment at different concentrations of OTC ( $0.3, 1, 2, 3, 4, 5 \mu\text{mol}\cdot\text{L}^{-1}$ ) and the corresponding photographs. The upper illustration shows the photos of the corresponding concentrations. (B) Fitting curve of  $A_{600}/A_{410}$  and  $\lg(C_{\text{OTC}})$ . Error bars represent the standard deviation of three independent measurements. Substance concentration:  $120 \mu\text{mol}\cdot\text{L}^{-1}$  p-aminophenol,  $120 \mu\text{mol}\cdot\text{L}^{-1}$   $\text{AgNO}_3$ ,  $0.0317 \mu\text{mol}\cdot\text{L}^{-1}$  AuNPs,  $0.08 \mu\text{mol}\cdot\text{L}^{-1}$  Apts,  $500 \mu\text{mol}\cdot\text{L}^{-1}$   $\text{Mg}(\text{NO}_3)_2$

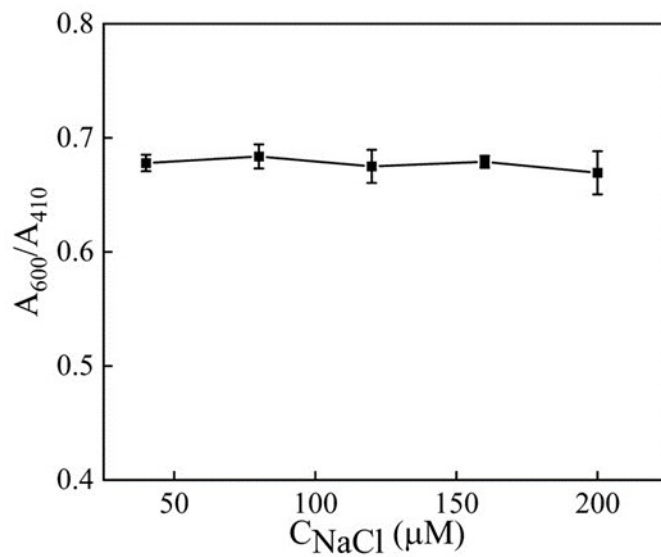

**Fig. S8** Effect of salt concentration on TCs detection, NaCl+Apts+Mg(NO<sub>3</sub>)<sub>2</sub>+AuNPs +TET+p-aminophenol+AgNO<sub>3</sub>. Substance concentration: 120  $\mu\text{mol}\cdot\text{L}^{-1}$  AgNO<sub>3</sub>, 120  $\mu\text{mol}\cdot\text{L}^{-1}$  p-aminophenol, 0.0317  $\mu\text{mol}\cdot\text{L}^{-1}$  AuNPs, 0.08  $\mu\text{mol}\cdot\text{L}^{-1}$  Apts, 2  $\mu\text{mol}\cdot\text{L}^{-1}$  TET, 500  $\mu\text{mol}\cdot\text{L}^{-1}$  Mg(NO<sub>3</sub>)<sub>2</sub>

**Table S2** Comparison of different TET determination methods in analytical performances

| <b>Probe</b>    | <b>Procedure</b>                           | <b>Time/min</b> | <b>Linear range</b> | <b>LOD<br/>(nmol·L<sup>-1</sup>)</b> | <b>References</b> |
|-----------------|--------------------------------------------|-----------------|---------------------|--------------------------------------|-------------------|
| AuNPs@Apt       | AuNPs aggregation using NaCl               | 10              | 50 nM~3.0 μM        | 32.9                                 | <sup>1</sup>      |
| AuNPs@Apt       | AuNPs aggregation using CTAB               | 30              | 10 nM~2 μM          | 122                                  | <sup>2</sup>      |
| AuNPs@Apt       | AuNPs aggregation using NaCl               | 20              | 100 nM~5 μM         | 71                                   | <sup>3</sup>      |
| Enzyme          | -                                          | 6               | 100 nM~10 μM        | 60                                   | <sup>4</sup>      |
| D-Trp-OMe@AuNCs | -                                          | 20              | 1.5μM ~30 μM        | 200                                  | <sup>5</sup>      |
| DNAzyme         | -                                          | 17              | 11 nM~1 μM          | 3.1                                  | <sup>6</sup>      |
| AuNPs@Apt       | AuNPs aggregation and silver metallization | 5               | 400 nM~6 μM         | 40.88                                | This work         |

AuNPs= Gold nanoparticles, Apt= Aptamer, AuNCs= Gold cluster, D-Trp-OMe= D-tryptophane methyl ester. CTAB= hexadecyltrimethylammonium bromide.

## References

1. Y.-Y. Wu, P. Huang, F.-Y. Wu, *Food Chem.* , 2020 , **304**, 125377
2. L. He, Y. Luo, W. Zhi, Y. Wu, P. Zhou, *Aust. J. Chem.* , 2013, **66**, 485-490
3. M. Qi, C. Tu, Y. Dai, W. Wang, A. Wang, J. Chen, *Anal. Methods*, 2018, **10**, 3402-3407
4. M. Besharati, M.-A. Tabrizi, F. Molaabasi, R. Saber, M. Shamsipur, J. Hamed, S. Hosseinkhan., *Biotechnol. Appl. Biochem.*, 2020, DOI: 10.1002/bab.2078
5. Y. Song, J. Qiao, W. Liu, L. Qi, *Microchem. J.*, 2020. **157**, 104871
6. Y. Tang, X. Huang, X. Wang, C. Wang, H. Tao, Y. Wu, *Food Chem.*, 2022, **366**, 130560
